# Supplementary material
Source: ML conference proceedings conference paper supplement (https://proceedings.mlr.press/v33/wang14b.html)
Supplement: Supplementary file [file wang14b-supp.pdf]

---

## Supplementary Material: An LP for Sequential Learning Under Budget Constraints

---

Joseph Wang  
Boston University

Kirill Trapeznikov  
Boston University

Venkatesh Saligrama  
Boston University

]

**Additional Details for Proof of Theorem 3.1** The empirical risk, as shown in the Proof of Theorem 3.1, can be expressed:

$$R(f^1, \dots, f^K, x, y) = 1 + \alpha \sum_{k=1}^K c_k - \sum_{k=1}^K \pi^k + \sum_{k=1}^K \pi^k \max \left( \mathbb{1}_{g^k(x^k) > 0}, \mathbb{1}_{g^1(x^1) \leq 0}, \dots, \mathbb{1}_{g^{k-1}(x^{k-1}) \leq 0} \right).$$

We focus solely on the maximization term, which can be equivalently expressed by introducing new variables  $\lambda_1^1, \dots, \lambda_K^K$ :

$$\sum_{k=1}^K \pi^k \max_{\lambda_1^1, \dots, \lambda_k^k \in [0, 1]} \left( \lambda_k^k \mathbb{1}_{g^k(x^k) > 0} + \sum_{j=1}^{k-1} \lambda_k^j \mathbb{1}_{g^j(x^j) \leq 0} \right)$$

where the variables  $\lambda_1^1, \dots, \lambda_K^K$  are constrained  $\sum_{j=1}^k \lambda_k^j = 1$ . Consider the first  $j$  such that  $g^j(x^j) \leq 0$ . For all  $k > j$ , one optimal solution for the indicators is  $\lambda_k^j = 1$ , as the indicator  $\mathbb{1}_{g^j(x^j) \leq 0} = 1$ . Additionally, for all  $k < j$ , the solution  $\lambda_k^k = 1$  is a valid solution. Restricting the solutions of  $\lambda_1^1, \dots, \lambda_K^K$  to this form forces the solution to lie on a hyperplane. We can enforce this constraint, which allows the variables  $\lambda_1^1, \dots, \lambda_K^K$  to be eliminated and the maximization to be expressed:

$$\max_{k \in \{1, \dots, K\}} \left( \left( \sum_{j=k+1}^K \pi^j \right) \mathbb{1}_{g^k(x^k) > 0} + \sum_{j=1}^{k-1} \pi^j \mathbb{1}_{g^j(x^j) \leq 0} \right).$$

Substituting into

$$R(f^1, \dots, f^K, x, y) = 1 + \alpha \sum_{k=1}^K c_k - \sum_{k=1}^K \pi^k + \sum_{k=1}^K \pi^k \max \left( \mathbb{1}_{g^k(x^k) > 0}, \mathbb{1}_{g^1(x^1) \leq 0}, \dots, \mathbb{1}_{g^{k-1}(x^{k-1}) \leq 0} \right)$$

produces the empirical risk as shown in (6).

**Details of Proposition 4.1** The linear program in (8) introduces new variables to replace the maximization functions in the reformulated empirical risk and the hinge losses. In particular, the variable  $\gamma_i$  replaces the maximization  $\max_{k \in \{1, \dots, K\}} \dots$ , the variables  $\beta_i^k$  captures the hinge-loss maximization  $\max(1 - g^k(\mathbf{x}_i^k), 0) \geq \mathbb{1}_{g^k(\mathbf{x}_i^k) \leq 0}$ , and the variables  $\kappa_i^k$  captures the hinge-loss maximization  $\max(1 + g^k(\mathbf{x}_i^k), 0) \geq \mathbb{1}_{g^k(\mathbf{x}_i^k) \geq 0}$ . Introducing the variables  $\gamma_i, \beta_i^k, \kappa_i^k$  allow the maximizations to be replaced with constraints. Additionally, we drop the constant terms in the optimization as these do not affect the functions  $g^1, \dots, g^K$  found by solving the optimization.
